# Supplementary material for: Quinquethiophene-based fully nonfused electron acceptors towards efficient organic solar cells via side-chain engineering
Source: Royal Society of Chemistry journal article supplement (doi:10.1039/d4tc01176g), 2024-01-01
Supplement: d4tc01176g1.pdf [file d4tc01176g1.pdf]

***Supporting Information***

**Quinquethiophene-based fully nonfused electron acceptors towards  
efficient organic solar cells via side-chain engineering**

Leiquan Huang<sup>a</sup>, Liying Dong<sup>a</sup>, Xizhe Chu<sup>a</sup>, Siyuan Zang<sup>a</sup>, Huayu Qiu<sup>a</sup>, Bofang Shan<sup>b</sup>,  
Zhigang Ni<sup>a</sup>, Qian Zhang<sup>a,\*</sup>

a. College of Material, Chemistry and Chemical Engineering, Hangzhou Normal University, Key Laboratory of Organosilicon Chemistry and Material Technology of Ministry of Education, Hangzhou, 311121, China. E-mail: qzhang@hznu.edu.cn.

b. Zhejiang Hengfeng New Material Co., LTD., Shaoxing 312000, China.

## Materials and synthesis

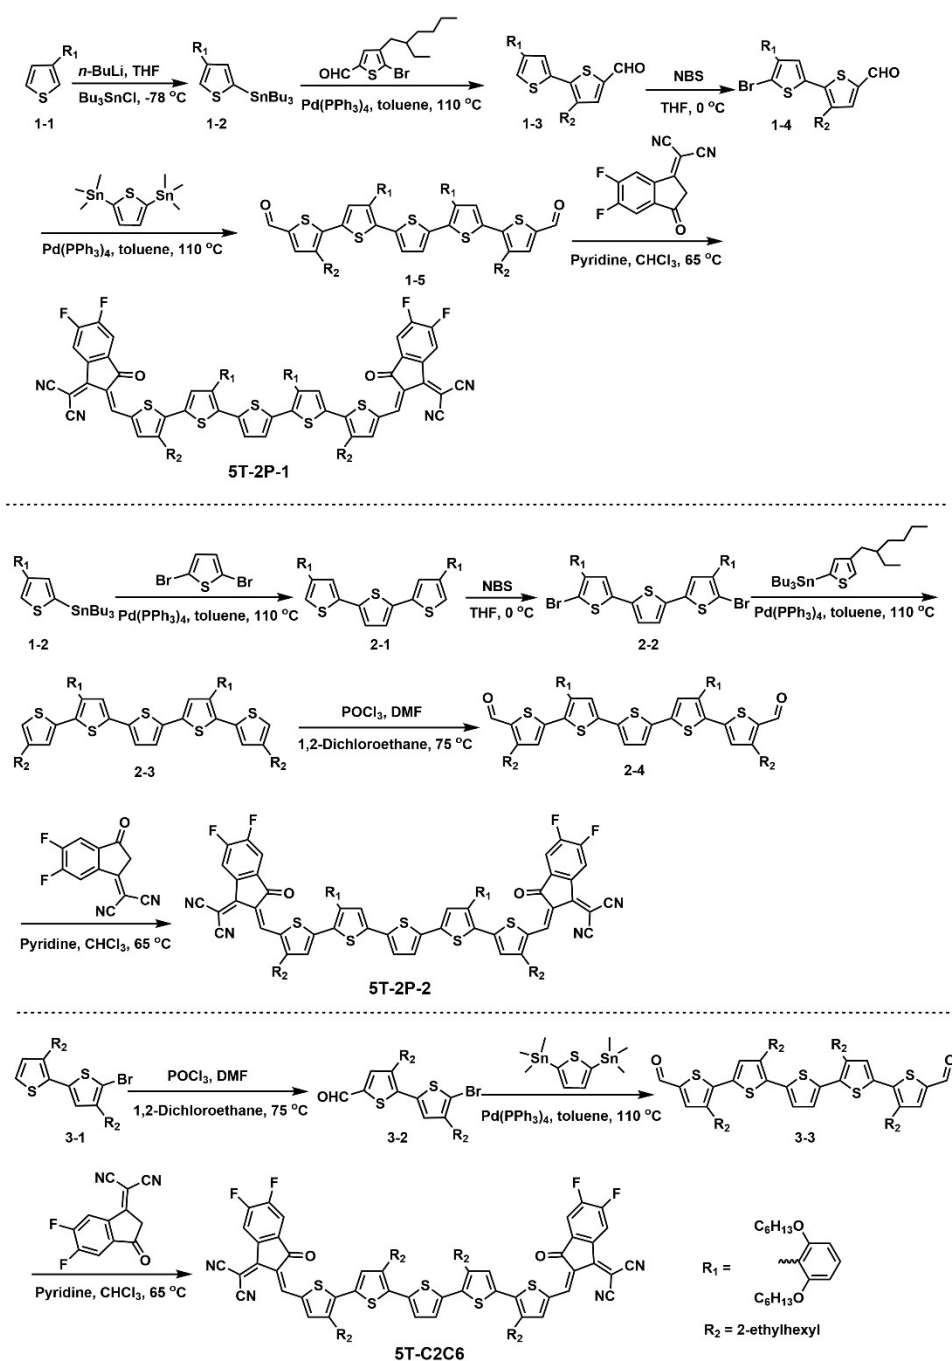

**Scheme S1** Synthetic routes of 5T-C2C6, 5T-2P-1 and 5T-2P-2.

All the used solvents and reagents were analytical grade and used without further purification. FNEAs were obtained following the synthetic routes as shown in Scheme 1. D18, and compound 1-1 and compound 7 were purchased from commercial sources. Compounds 1-1<sup>[1]</sup> and 3-1<sup>[2]</sup> were synthesized according to the reported literature.

**(4-(2,6-bis(hexyloxy)phenyl)thiophen-2-yl)tributylstannane (Compound 1-2):** To a solution of compound 1-1 (660 mg, 1.83 mmol) in dry tetrahydrofuran (20 mL) was added slowly *n*-butyllithium (2.5 M, 2.20 mmol in hexane, 0.88 mL) at -78 °C under nitrogen atmosphere and stirred for 2 h. Then tributyltin chloride (976 mg, 3.0

mmol) was added dropwise and stirred at -78 °C for 0.5 h and the mixture was gradually warmed to room temperature. After removal of solvent in vacuo, the mixture was then poured into water (100 mL) and extracted with dichloromethane (100 mL × 3). The combined organic layer was dried over anhydrous MgSO<sub>4</sub>. Removal of the solvent under reduced pressure gave the crude compound 1-2 as colorless oily liquid. Without any further purification, the product was used into the following reaction.

**4'-(2,6-bis(hexyloxy)phenyl)-3-(2-ethylhexyl)-[2,2'-bithiophene]-5-carbaldehyde (Compound 1-3):** Compound 1-2 (593 mg, 0.91 mmol), 5-bromo-4-(2-ethylhexyl)thiophene-2-carbaldehyde (303 mg, 0.91 mmol) and Pd(PPh<sub>3</sub>)<sub>4</sub> (20 mg, 0.017 mmol) were dissolved in anhydrous toluene (20 mL) and stirred at 110 °C for 12 h under nitrogen atmosphere. Then the reaction mixture was cooled to room temperature and poured into water (100 mL) and then extracted with dichloromethane (100 mL × 3). The combined organic layer was dried over anhydrous MgSO<sub>4</sub> and concentrated under reduced pressure. The raw product was purified with chromatography column by using petroleum ether/dichloromethane (3:1, v/v) as eluent, which yielded compound 1-3 as yellow oily liquid (370 mg, 0.63 mmol, 70%).

<sup>1</sup>H NMR (500 MHz, CDCl<sub>3</sub>) δ 9.85 (s, 1H), 7.62 (d, J = 1.2 Hz, 1H), 7.59 (d, J = 1.2 Hz, 1H), 7.58 (s, 1H), 7.21 (t, J = 8.3 Hz, 1H), 6.64 (d, J = 8.4 Hz, 2H), 3.97 (t, J = 6.5 Hz, 4H), 2.82 (d, J = 7.3 Hz, 2H), 1.77 – 1.72 (m, 5H), 1.42 – 1.36 (m, 7H), 1.31 – 1.27 (m, 12H), 0.91 – 0.86 (m, 13H). <sup>13</sup>C NMR (126 MHz, CDCl<sub>3</sub>) δ 182.58, 157.34, 142.97, 139.82, 139.62, 139.04, 133.76, 131.96, 131.67, 128.73, 127.34, 113.97, 105.33, 68.84, 40.08, 33.49, 32.59, 31.55, 29.29, 28.76, 25.89, 25.68, 23.10, 22.63, 14.14, 14.02, 10.70.

**5'-Bromo-4'-(2,6-bis(hexyloxy)phenyl)-3-(2-ethylhexyl)-[2,2'-bithiophene]-5-carbaldehyde (Compound 1-4):** To a solution of compound 1-3 (326 mg, 0.56 mmol) in tetrahydrofuran (20 mL) was added by three times N-bromosuccinimide (109 mg, 0.61 mmol) slowly at 0 °C and the mixture was stirred at the same temperature for 3 h in the dark. After removal of solvent in vacuo, the mixture was then poured into water (100 mL) and extracted with dichloromethane (100 mL × 3). The combined organic layer was dried over anhydrous MgSO<sub>4</sub> and concentrated under reduced pressure. The mixture was purified with chromatography column by using petroleum ether/dichloromethane (5:1, v/v) as eluent to afford compound 1-4 as a yellow oily liquid (260 mg, 0.39 mmol, 70%). <sup>1</sup>H NMR (500 MHz, CDCl<sub>3</sub>) δ 9.82 (s, 1H), 7.54 (s, 1H), 7.26 (t, J = 8.3 Hz, 1H), 7.08 (s, 1H), 6.59 (d, J = 8.4 Hz, 2H), 3.92 (t, J = 6.4 Hz, 4H), 2.73 (d, J = 7.3 Hz, 2H), 1.69 – 1.64 (m, 5H), 1.36 – 1.31 (m, 7H), 1.27 – 1.23 (m, 12H), 0.83 – 0.77 (m, 13H). <sup>13</sup>C NMR (126 MHz, CDCl<sub>3</sub>) δ 182.58, 157.69, 141.55, 140.27, 139.57, 139.36, 136.19, 133.05, 131.29, 129.91, 114.25, 112.73, 104.98, 68.66, 40.10, 33.49, 32.60, 31.48, 29.18, 28.77, 25.69, 23.07, 22.62, 14.13, 14.03, 10.68.

**3''',4'-bis(2,6-bis(hexyloxy)phenyl)-3,3''''-bis(2-ethylhexyl)-[2,2':5',2'':5'',2''':5''',2''''-quinquethiophene]-5,5''''-dicarbaldehyde (Compound 1-5):** Compound 1-4 (168 mg, 0.25 mmol), 2,5-bis(trimethylstannyl)thiophene (46.8 mg, 0.11 mmol) and Pd(PPh<sub>3</sub>)<sub>4</sub> (30 mg, 0.026 mmol) were dissolved in anhydrous

toluene (20 mL) under nitrogen atmosphere. The mixture was stirred at 110 °C overnight. Then the reaction mixture was cooled to room temperature, removal of solvent in vacuo, poured into water (100 mL) and extracted with dichloromethane (100 mL × 3). The combined organic layer was dried over anhydrous MgSO<sub>4</sub> and concentrated with reduced pressure. The mixture was purified with chromatography column by using petroleum ether/dichloromethane (1:1, v/v) as eluent to obtain compound **1-5** as an orange oily liquid (70 mg, 0.056 mmol, 51%). <sup>1</sup>H NMR (500 MHz, CDCl<sub>3</sub>) δ 9.81 (s, 1H), 7.54 (s, 1H), 7.25 (d, J = 8.3 Hz, 1H), 7.06 (s, 1H), 6.89 (s, 1H), 6.49 (d, J = 8.4 Hz, 2H), 3.83 (dd, J = 15.0, 6.4 Hz, 2H), 3.65 (dd, J = 15.5, 6.4 Hz, 2H), 2.78 – 2.76 (m, 2H), 1.51 – 1.44 (m, 5H), 1.37 – 1.27 (m, 7H), 1.17 – 1.12 (m, 12H), 0.88 – 0.77 (m, 13H). <sup>13</sup>C NMR (126 MHz, CDCl<sub>3</sub>) δ 182.52, 158.00, 142.43, 139.75, 139.59, 139.05, 136.55, 135.86, 132.71, 131.08, 130.66, 129.82, 124.64, 113.67, 105.42, 68.59, 39.89, 33.68, 32.63, 31.48, 29.11, 28.79, 25.72, 25.53, 23.08, 22.56, 14.12, 13.99, 10.67. MS (MALDI-TOF) m/z: calcd for C<sub>74</sub>H<sub>100</sub>O<sub>6</sub>S<sub>5</sub> 1245.9; found, 1245.8.

**2,2'-((2Z,2'Z)-((3''',4'-bis(2,6-bis(hexyloxy)phenyl)-3,3''''-bis(2-ethylhexyl)-[2,2':5',2'':5'',2''':5''',2''''-quinquethiophene]-5,5''''-diyl)bis(methaneylylidene))bis(5,6-difluoro-3-oxo-2,3-dihydro-1H-indene-2,1-diylidene))dimalononitrile (5T-2P-1):** A solution of compound 1-5 (30 mg, 0.023 mmol), 2F-IC (16mg, 0.069 mmol) in anhydrous chloroform (10 mL) was degassed and charged with nitrogen before and after the addition of pyridine (0.1 mL). Subsequently, the mixture was stirred at 65 °C overnight. Then the reaction mixture was cooled to room temperature and poured into methanol (100 mL). The crude product was purified with chromatography column by using petroleum ether/dichloromethane (1:2, v/v) as eluent to obtain 5T-2P-1 as a dark solid (25 mg, 0.015 mmol, 65%). <sup>1</sup>H NMR (500 MHz, CDCl<sub>3</sub>) δ 8.77 (s, 1H), 8.53 (dd, J = 9.9, 6.5 Hz, 1H), 7.65 (dd, J = 12.9, 5.1 Hz, 2H), 7.34 (s, 1H), 7.29 (t, J = 8.4 Hz, 1H), 7.00 (s, 1H), 6.51 (d, J = 8.4 Hz, 2H), 3.85 (dd, J = 13.9, 6.5 Hz, 2H), 3.67 (dt, J = 8.9, 6.5 Hz, 2H), 2.80 (d, J = 7.3 Hz, 2H), 1.47 (d, J = 5.7 Hz, 4H), 1.37 – 1.29 (m, 8H), 1.14 (d, J = 9.8 Hz, 12H), 0.92 – 0.75 (m, 13H). <sup>13</sup>C NMR (126 MHz, CDCl<sub>3</sub>) δ 185.88, 158.47, 157.91, 151.26, 149.62, 140.13, 138.13, 137.57, 137.10, 134.40, 133.81, 132.25, 130.93, 130.16, 125.45, 120.97, 115.00, 114.83, 114.41, 114.30, 113.06, 112.60, 112.45, 105.35, 99.99, 69.30, 68.55, 39.41, 33.67, 32.65, 31.45, 29.09, 28.74, 25.79, 25.53, 23.09, 22.56, 14.12, 13.98, 10.64. MS (MALDI-TOF) m/z: calcd for C<sub>98</sub>H<sub>104</sub>F<sub>4</sub>N<sub>4</sub>O<sub>6</sub>S<sub>5</sub> 1668.6; found, 1668.1.

**(4,4''-bis(2,6-bis(hexyloxy)phenyl)-2,2':5',2''-terthiophene (Compound 2-1):** Compound **1-2** (570 mg, 0.88 mmol), 2,5-dibromothiophene (95 mg, 0.39 mmol) and Pd(PPh<sub>3</sub>)<sub>4</sub> (30 mg, 0.026 mmol) were dissolved in anhydrous toluene (20 mL) under nitrogen atmosphere. The mixture was stirred at 110 °C overnight. Then the reaction mixture was cooled to room temperature, removal of solvent in vacuo, poured into water (100 mL) and extracted with dichloromethane (100 mL × 3). The combined organic layer was dried over anhydrous MgSO<sub>4</sub> and concentrated with reduced pressure. The mixture was purified with chromatography column by using petroleum ether/dichloromethane (9:1, v/v) as eluent to yield compound **2-1** (78 mg, 0.097 mmol, 25%). <sup>1</sup>H NMR (500 MHz, CDCl<sub>3</sub>) δ 7.43 (d, J = 1.1 Hz, 1H), 7.33 (d, J = 1.1 Hz, 1H),

7.19 (dd,  $J = 10.3, 6.3$  Hz, 1H), 7.06 (s, 1H), 6.61 (d,  $J = 8.4$  Hz, 2H), 3.95 (t,  $J = 6.4$  Hz, 4H), 1.74 – 1.70 (m, 4H), 1.39 (dd,  $J = 14.3, 6.5$  Hz, 5H), 1.27 (dd,  $J = 8.5, 4.7$  Hz, 8H), 0.84 (t,  $J = 6.9$  Hz, 6H).  $^{13}\text{C}$  NMR (126 MHz,  $\text{CDCl}_3$ )  $\delta$  157.43, 136.58, 134.16, 128.46, 127.63, 127.11, 124.22, 123.53, 114.61, 105.44, 68.88, 31.58, 29.29, 25.92, 22.65, 14.05.

**4,4''-bis(2,6-bis(hexyloxy)phenyl)-5,5''-dibromo-2,2':5',2''-terthiophene**

**(Compound 2-2):** To a solution of compound **2-1** (78 mg, 0.097 mmol) in tetrahydrofuran (20 mL) was added by three times N-bromosuccinimide (36 mg, 0.2 mmol) slowly at 0 °C and the mixture was stirred at the same temperature for 3 h in the dark. After removal of solvent in vacuo, the mixture was then poured into water (100 mL) and extracted with dichloromethane (100 mL  $\times$  3). The combined organic layer was dried over anhydrous  $\text{MgSO}_4$ . After concentrate the organic layer by vacuum evaporation, the raw product was purified with chromatography column by using petroleum ether/dichloromethane (7:1) as eluent, and compound **2-2** was obtained as yellow oily liquid (70 mg, 0.073 mmol, 75%).  $^1\text{H}$  NMR (500 MHz,  $\text{CDCl}_3$ )  $\delta$  7.26 (t,  $J = 8.3$  Hz, 1H), 6.99 (s, 1H), 6.94 (s, 1H), 6.60 (d,  $J = 8.4$  Hz, 1H), 3.95 (t,  $J = 6.4$  Hz, 3H), 1.77 – 1.68 (m, 3H), 1.39 (m, 4H), 1.27 (m, 8H), 0.84 (t,  $J = 6.9$  Hz, 6H).  $^{13}\text{C}$  NMR (126 MHz,  $\text{CDCl}_3$ )  $\delta$  156.69, 135.03, 134.84, 134.19, 128.62, 126.03, 122.80, 112.27, 109.87, 104.08, 67.73, 30.44, 28.11, 24.65, 21.57, 12.96.

**3',4'''-bis(2,6-bis(hexyloxy)phenyl)-4,4'''-bis(2-ethylhexyl)-**

**2,2':5',2'':5'',2''':5''',2'''-quiquethiophene (Compound 2-3):** Compound **2-2** (70 mg, 0.073 mmol), tributyl(4-(2-ethylhexyl)thiophen-2-yl)stannane (73 mg, 0.15 mmol) and  $\text{Pd}(\text{PPh}_3)_4$  (20 mg, 0.017 mmol) were dissolved in anhydrous toluene (20 mL) under nitrogen atmosphere. The mixture was stirred at 110 °C overnight.. Then the reaction mixture was cooled to room temperature, removal of solvent in vacuo, poured into water (100 mL) and extracted with dichloromethane (100 mL  $\times$  3). The combined organic layer was dried over anhydrous  $\text{MgSO}_4$  and concentrated with reduced pressure. The mixture was purified with chromatography column by using petroleum ether/dichloromethane (5:1, v/v) as eluent to obtain compound **2-3** as a yellow oily liquid (42 mg, 0.035mmol, 24%).  $^1\text{H}$  NMR (500 MHz,  $\text{CDCl}_3$ )  $\delta$  7.30 (t,  $J = 8.3$  Hz, 1H), 7.08 (s, 1H), 7.02 (s, 1H), 6.80 (s, 1H), 6.62 (d,  $J = 2.8$  Hz, 2H), 6.60 (s, 1H), 3.91 (dt,  $J = 9.0, 6.4$  Hz, 2H), 3.80 (dd,  $J = 8.9, 1.5$  Hz, 2H), 2.44 (t,  $J = 6.4$  Hz, 2H), 1.57 – 1.52 (m, 4H), 1.31 (s, 2H), 1.28 (s, 6H), 1.25 – 1.18 (m, 13H), 0.91 (t,  $J = 6.6$  Hz, 3H), 0.88 – 0.8 (m, 9H).  $^{13}\text{C}$  NMR (126 MHz,  $\text{CDCl}_3$ )  $\delta$  158.31, 141.38, 136.68, 136.18, 132.92, 132.84, 130.89, 129.51, 128.35, 125.90, 123.59, 120.30, 114.61, 105.44, 68.74, 40.20, 34.33, 32.48, 31.50, 29.10, 28.92, 25.56, 25.52, 23.08, 22.60, 14.20, 14.02, 10.85.

**3',4'''-bis(2,6-bis(hexyloxy)phenyl)-4,4'''-bis(2-ethylhexyl)-**

**[2,2':5',2'':5'',2''':5''',2'''-quiquethiophene]-5,5'''-dicarbaldehyde (Compound 2-4):** Compound **2-3** (42 mg, 0.035mmol) was dissolved in 1,2-dichloroethane (20 mL) under nitrogen atmosphere, and then the fresh Vilsmeier reagent (1 mL  $\text{POCl}_3$  in 1 mL DMF) was added dropwise at 0 °C. The mixture was heated to 80 °C and stirred for 8 h. The reaction was quenched with saturated  $\text{NaHCO}_3$  solution and allowed to stir at

room temperature for 24 h. Removal of solvent in vacuo, poured into water (100 mL) and extracted with dichloromethane (100 mL  $\times$  3). The combined organic layer was dried over anhydrous  $\text{MgSO}_4$  and concentrated with reduced pressure. The mixture was purified with chromatography column by using petroleum ether/dichloromethane (2:1, v/v) as eluent to obtain compound **2-4** as an orange-red oily liquid (30 mg, 0.024 mmol, 69%).  $^1\text{H}$  NMR (500 MHz,  $\text{CDCl}_3$ )  $\delta$  9.86 (s, 1H), 7.31 (t,  $J$  = 8.4 Hz, 1H), 7.14 (s, 1H), 7.05 (s, 1H), 6.83 (s, 1H), 6.60 (d,  $J$  = 8.4 Hz, 2H), 3.90 (dt,  $J$  = 8.9, 6.3 Hz, 2H), 3.84 – 3.79 (m, 2H), 2.74 (t,  $J$  = 7.5 Hz, 2H), 1.53 – 1.50 (m, 4H), 1.29 – 1.25 (m, 8H), 1.16 (dd,  $J$  = 9.7, 4.6 Hz, 11H), 0.87 (dd,  $J$  = 15.4, 8.0 Hz, 8H), 0.77 (d,  $J$  = 7.1 Hz, 6H).  $^{13}\text{C}$  NMR (126 MHz,  $\text{CDCl}_3$ )  $\delta$  181.65, 157.84, 152.07, 145.98, 136.33, 136.31, 135.37, 134.75, 131.35, 130.44, 129.00, 127.49, 124.58, 113.23, 105.44, 68.60, 41.38, 32.51, 32.47, 31.40, 29.01, 28.78, 25.55, 25.53, 22.98, 22.57, 14.13, 13.96, 10.75. MS (MALDI-TOF)  $m/z$ : calcd for  $\text{C}_{74}\text{H}_{100}\text{O}_6\text{S}_5$  1245.9; found, 1245.6.

**2,2'-((2Z,2'Z)-((3',4'''-bis(2,6-bis(hexyloxy)phenyl)-4,4''''-bis(2-ethylhexyl)-[2,2':5',2'':5'',2''':5''',2''''-quinquethiophene]-5,5''''-diyl)bis(methaneylylidene))bis(5,6-difluoro-3-oxo-2,3-dihydro-1H-indene-2,1-diylidene))dimalononitrile (5T-2P-2):** 5T-2P-2 (23 mg, 0.014 mmol, 60%) was obtained as a dark red solid from compound **2-4** (30 mg, 0.023 mmol) and 2F-IC (16mg, 0.069 mmol) following the procedure for the synthesis of 5T-2P-1.  $^1\text{H}$  NMR (500 MHz,  $\text{CDCl}_3$ )  $\delta$  8.87 (s, 1H), 8.51 (dd,  $J$  = 10.0, 6.5 Hz, 1H), 7.66 (d,  $J$  = 7.6 Hz, 1H), 7.38 (t,  $J$  = 8.4 Hz, 1H), 7.24 (s, 1H), 7.17 (s, 1H), 6.83 (s, 1H), 6.67 (d,  $J$  = 8.5 Hz, 2H), 3.95 – 3.92 (m, 2H), 3.88 (dd,  $J$  = 6.2, 2.8 Hz, 2H), 2.74 (t,  $J$  = 7.3 Hz, 2H), 1.54 (d,  $J$  = 6.8 Hz, 4H), 1.27 – 1.15 (m, 21H), 0.88 (s, 3H), 0.81 (s, 3H), 0.75 (d,  $J$  = 6.6 Hz, 6H).  $^{13}\text{C}$  NMR (126 MHz,  $\text{CDCl}_3$ )  $\delta$  185.42, 161.48, 159.62, 157.70, 153.17, 138.82, 137.38, 136.80, 136.38, 134.68, 133.22, 132.03, 131.49, 130.57, 129.78, 127.81, 125.53, 124.46, 119.78, 115.18, 114.81, 114.68, 113.23, 112.46, 112.40, 105.34, 68.64, 41.58, 34.15, 32.14, 31.41, 29.03, 28.64, 25.60, 25.22, 22.96, 22.57, 14.14, 13.98, 10.68. MS (MALDI-TOF)  $m/z$ : calcd for  $\text{C}_{98}\text{H}_{104}\text{F}_4\text{N}_4\text{O}_6\text{S}_5$  1668.65; found, 1668.18.

**5'-bromo-3,4'-bis(2-ethylhexyl)-[2,2'-bithiophene]-5-carbaldehyde (Compound 3-2):** Adding DMF and dichloroethane in a reactor reacting at 0°C for 0.5 h to obtain Vilsmeier-Haack reagent. Compound **3-1** (468 mg, 1.0 mmol) and 1,2-dichloroethane (20 mL) was dissolved in Vilsmeier-Haack reagent. The mixture was stirred at 75 °C for 8 h. Then the reaction mixture was cooled to room temperature, removal of solvent in vacuo, poured into water (100 mL) and extracted with dichloromethane (100 mL  $\times$  3). The combined organic layer was dried over anhydrous  $\text{MgSO}_4$ . After concentrate the organic layer by vacuum evaporation, the raw product was purified with chromatography column by using petroleum ether/dichloromethane (3:1, v/v) as eluent, and compound **3-2** was obtained as yellow oily liquid (313 mg, 0.63 mmol, 63%).  $^1\text{H}$  NMR (500 MHz,  $\text{CDCl}_3$ )  $\delta$  9.82 (s, 1H), 7.54 (s, 1H), 6.92 (s, 1H), 2.68 (d,  $J$  = 7.3 Hz, 2H), 2.51 (d,  $J$  = 7.2 Hz, 2H), 1.63 (dt,  $J$  = 12.1, 5.9 Hz, 2H), 1.34 (dd,  $J$  = 13.6, 7.4 Hz, 5H), 1.31 – 1.28 (m, 7H), 1.25 (d,  $J$  = 6.5 Hz, 6H), 0.91 – 0.83 (m, 14H).  $^{13}\text{C}$  NMR (126 MHz,  $\text{CDCl}_3$ )  $\delta$  182.53, 142.13, 140.86, 140.55, 139.90, 139.29, 134.17, 129.08, 111.77, 40.10, 39.96, 33.72, 33.42, 32.49, 32.45, 28.80, 28.65, 25.72, 25.64, 23.05, 23.04, 14.14, 14.10, 10.84, 10.66. MS (MALDI-TOF)  $m/z$ : calcd

for  $C_{25}H_{37}BrOS_2$  497.6; found, 498.5.

**3,3''',3''',4'-tetrakis(2-ethylhexyl)-[2,2':5',2'':5'',2''':5''',2''''-quinquethiophene]-5,5''''-dicarbaldehyde (Compound 3-3):** Compound **3-3** (60 mg, 0.065 mmol, 73%) was obtained as an orange solid from compound **3-2** (100 mg, 0.2 mmol), 2,5-bis(trimethylstannyl)thiophene (38 mg, 0.09 mmol) and Pd (PPh<sub>3</sub>)<sub>4</sub> (20 mg, 0.017 mmol) following the procedure for the synthesis of **1-5**. <sup>1</sup>H NMR (500 MHz, CDCl<sub>3</sub>) δ 9.84 (s, 1H), 7.56 (s, 1H), 7.13 (s, 1H), 7.10 (s, 1H), 2.77 (d, *J* = 7.3 Hz, 2H), 2.74 (d, *J* = 7.4 Hz, 2H), 1.73 – 1.66 (m, 2H), 1.37 – 1.33 (m, 4H), 1.28 (dd, *J* = 13.0, 5.9 Hz, 12H), 0.87 (dt, *J* = 7.3, 3.5 Hz, 12H). <sup>13</sup>C NMR (126 MHz, CDCl<sub>3</sub>) δ 182.57, 141.48, 140.21, 139.70, 139.67, 139.65, 135.81, 132.99, 132.83, 131.19, 126.83, 40.26, 40.07, 33.63, 33.60, 32.56, 32.53, 28.72, 28.71, 25.81, 25.71, 23.08, 23.08, 14.14, 14.14, 10.78, 10.71. MS (MALDI-TOF) *m/z*: calcd for C<sub>54</sub>H<sub>76</sub>O<sub>2</sub>S<sub>5</sub> 917.5; found, 917.6.

**2,2'-((2*Z*,2'*Z*)-((3,3''',3''',4'-tetrakis(2-ethylhexyl)-[2,2':5',2'':5'',2''':5''',2''''-quinquethiophene]-5,5''''-diyl)bis(methaneylylidene))bis(5,6-difluoro-3-oxo-2,3-dihydro-1*H*-indene-2,1-diylidene))dimalononitrile (5T-C2C6):** **5T-C2C6** (58 mg, 0.043 mmol, 59%) was obtained as a dark red solid from compound **3-3** (63 mg, 0.073 mmol) and 2F-IC (50 mg, 0.219 mmol) following the procedure for the synthesis of **5T-2P-1**. <sup>1</sup>H NMR (500 MHz, CDCl<sub>3</sub>) δ 8.78 (s, 1H), 8.53 (dd, *J* = 9.7, 6.4 Hz, 1H), 7.69 (t, *J* = 7.4 Hz, 1H), 7.64 (s, 1H), 7.34 (s, 1H), 7.21 (s, 1H), 2.80 (t, *J* = 7.4 Hz, 4H), 1.74 (d, *J* = 5.5 Hz, 2H), 1.57 (s, 2H), 1.43 – 1.35 (m, 6H), 1.29 (d, *J* = 4.2 Hz, 12H), 0.95 – 0.86 (m, 12H). <sup>1</sup>H NMR (500 MHz, CDCl<sub>3</sub>) δ 8.78 (s, 1H), 8.53 (dd, *J* = 9.9, 6.5 Hz, 1H), 7.69 (t, *J* = 7.5 Hz, 1H), 7.64 (s, 1H), 7.34 (s, 1H), 7.21 (s, 1H), 2.80 (t, *J* = 7.4 Hz, 4H), 1.81 – 1.71 (m, 2H), 1.41 – 1.37 (m, 4H), 1.29 (s, 10H), 0.94 – 0.86 (m, 13H). <sup>13</sup>C NMR (126 MHz, CDCl<sub>3</sub>) δ 185.92, 158.47, 158.16, 149.71, 148.01, 141.54, 140.70, 140.16, 138.42, 137.52, 134.03, 132.84, 131.32, 130.65, 127.12, 120.34, 114.43, 114.32, 114.04, 112.62, 109.37, 105.40, 68.53, 53.44, 39.37, 33.70, 32.69, 31.44, 29.71, 29.07, 28.76, 25.79, 25.54, 23.08, 22.58, 14.11, 13.96, 10.63. MS (MALDI-TOF) *m/z*: calcd for C<sub>78</sub>H<sub>80</sub>F<sub>4</sub>N<sub>4</sub>O<sub>2</sub>S<sub>5</sub> 1341.8; found, 1341.6.

### Material Characterizations

<sup>1</sup>H-NMR and <sup>13</sup>C-NMR spectra were recorded on a Bruker AVANCE 500 spectrometer. <sup>1</sup>H NMR and <sup>13</sup>C NMR spectra were referenced to tetramethylsilane (0 ppm) for CDCl<sub>3</sub>. Mass spectra analyses were measured on a Bruker Autoflex maX MALDI-TOF mass spectrometry.

Thermal gravimetric analyses (TGA) were performed on TA Q500 instrument under nitrogen gas flow with a 10 °C min<sup>-1</sup> heating rate from 40 to 600 °C. Film UV-visible absorption spectra were obtained with double-beam Hitachi UH5300 spectrophotometer. The films were cast from the solutions of the acceptors with a concentration of 10 mg/mL in chloroform. UV-Vis absorption spectra were collected from the solution of two small molecules with the concentration of 1.0 × 10<sup>-5</sup> M in chloroform and a cuvette with a stopper (Sigma Z600628) was used to avoid volatilization during the measurement. The films were spin-coated from the chloroform solution (15 mg mL<sup>-1</sup>) on a quartz substrate at 2000 rpm for 30 s. The transmission electron microscopy (TEM) investigation was performed on Tecnai G2 F20 (FEI).

GIWAXS measurement was performed at MetalJet-D2, Excillum on the wavelength of 0.134144 nm with Xeuss 2.0. All samples were deposited on the silicon and were irradiated at a fixed X-ray incident angle of 0.2° with an exposure time of 1800 s.

Cyclic voltammetry (CV) analyses were conducted with the films on the glassy carbon working electrode in dry methanol solution via a LK2005A electrochemical workstation. All CV measurements were carried out at room temperature with a standard three-electrode configuration employing a glassy carbon electrode as the working electrode, a saturated calomel electrode (SCE) as the reference electrode, and a Pt wire as the counter electrode. Tetrabutylammonium phosphorus hexafluoride ( $\text{Bu}_4\text{NPF}_6$ , 0.1 M) in methanol was used as the supporting electrolyte, and the scan rate was 100 mV s<sup>-1</sup>. The HOMO energy levels were determined by  $E_{\text{HOMO}} = - (E_{\text{re}} - E_{\text{ferrocene}} + 4.8)$  eV, while the LUMO energy levels were determined by  $E_{\text{LUMO}} = - (E_{\text{ox}} - E_{\text{ferrocene}} + 4.8)$  eV.

### Device fabrication and measurements.

The ITO-coated glass substrates were cleaned via detergent, deionized water, acetone, and isopropyl alcohol under ultrasonication for 15 min each and subsequently dried by nitrogen. The ITO glasses were then treated with oxygen plasma for 60 s, 30 nm thick PEDOT:PSS (Clevios P AI4083) was spin-coated on the ITO substrates. After baking at 150 °C for 15 min, the substrates were transferred into a nitrogen-filled glovebox. Subsequently, the D18:NFEAs (1:1.6, w/w, D = 4 mg/mL) active layer dissolved in chloroform was spin-coated to form a film of 120 nm. The solution of PNDIT-F3N was spin-coated on the top of active layers. The top electrode was then formed by evaporation of 100 nm Ag through a shadow mask to define the active area (4 mm<sup>2</sup>) of the device.

The current density-voltage ( $J$ - $V$ ) curves were recorded at 100 mW·cm<sup>-2</sup> using an SS-X50 solar simulator (Enli Tech) with a standard Si solar cell as a calibration standard. The external quantum efficiency (EQE) was measured by QE-R solar cell spectral response measurement system (Enli Technology Co., Ltd., Taiwan). Photocurrent density-effective voltage ( $J_{\text{ph}}$ - $V_{\text{eff}}$ ) curves and photo-induced charge-carrier extraction in linearly increasing voltage (photo-CELIV) were measured via the all-in-one characterization platform Paios (Fluxim AG, Switzerland).

### Contact angle measurement.

The contact angles were measured by a contact angle meter (SL200KS). The droplets of water and ethylene glycol (EG) were dripped on the neat films. The surface tension ( $\gamma$ ) is estimated by the Harmonic mean equations:

$$(1 + \cos\theta_{\text{water}})\gamma_{\text{water}} = 2\sqrt{\gamma_{\text{water}}^d\gamma^d} + 2\sqrt{\gamma_{\text{water}}^p\gamma^p}$$

$$(1 + \cos\theta_{\text{EG}})\gamma_{\text{EG}} = 2\sqrt{\gamma_{\text{EG}}^d\gamma^d} + 2\sqrt{\gamma_{\text{EG}}^p\gamma^p}$$

$$\gamma^{\text{total}} = \gamma^d + \gamma^p$$

The interfacial tension between two different materials can be calculated by the following equation:

$$\gamma_{A-B} = \gamma_A + \gamma_B - 4 \left( \frac{\gamma_A^d \gamma_B^d}{\gamma_A^d + \gamma_B^d} + \frac{\gamma_A^p \gamma_B^p}{\gamma_A^p + \gamma_B^p} \right)$$

where  $\theta$  is the droplet contact angle on the neat film;  $\gamma_{A-B}$  represents the interface tension between A and B,  $\gamma_A$  and  $\gamma_B$  are the surface tensions of pure films, respectively. The  $\gamma_A^d$  and  $\gamma_A^p$  are the dispersion and polar forces of A, and the  $\gamma_B^d$  and  $\gamma_B^p$  are the dispersion and polar forces of B.

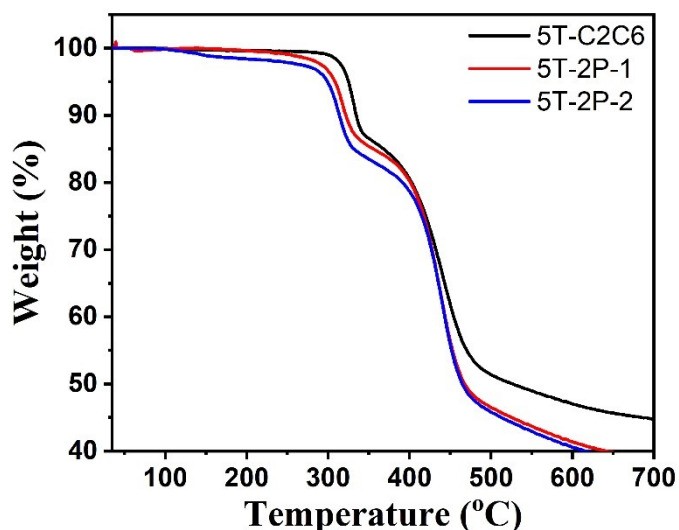

**Fig. S1** TGA curves of FNEAs recorded under N<sub>2</sub> atmosphere at a heating rate of 10 °C min<sup>-1</sup>.

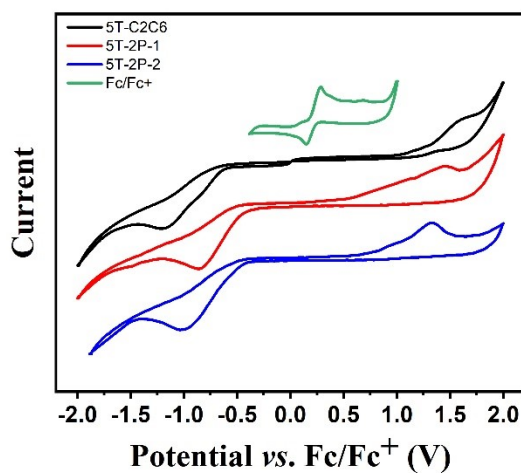

**Fig. S2** Cyclic voltammogram curves of FNEAs in methanol with 0.1 mol L<sup>-1</sup> Bu<sub>4</sub>NPF<sub>6</sub> with a scan rate of 100 mV s<sup>-1</sup>.

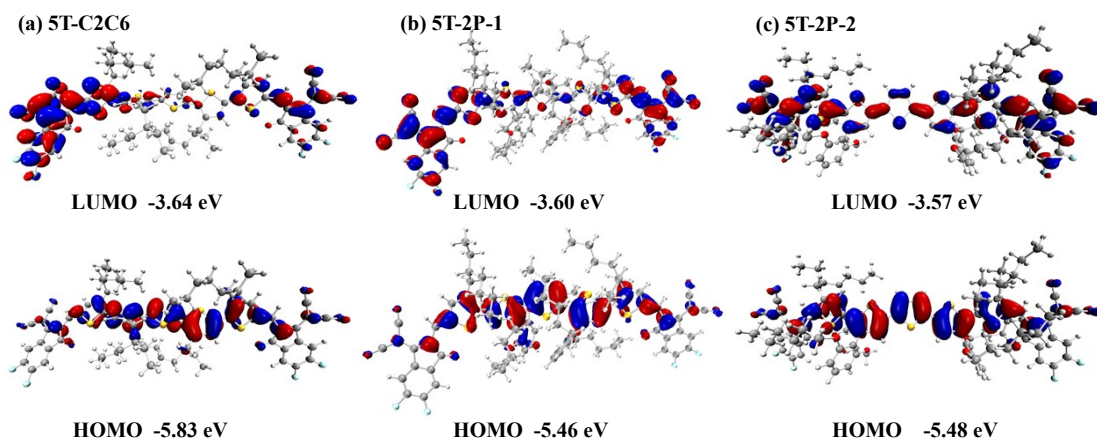

**Fig. S3** The calculated electron density distributions of HOMO and LUMO orbitals of the simplified FNEAs.

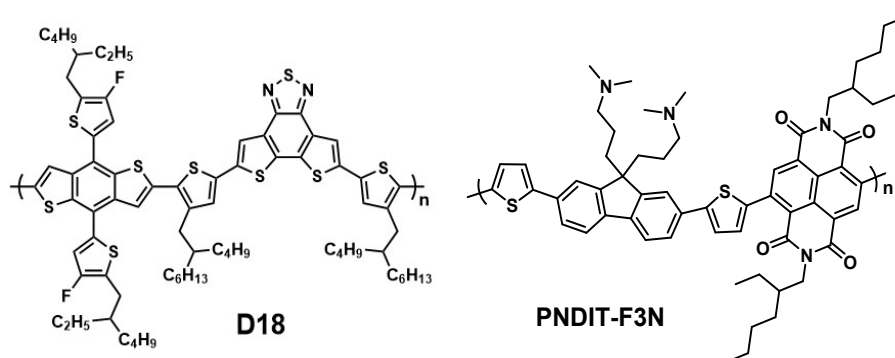

**Fig. S4** Chemical structures of D18 and PNDIT-F3N.

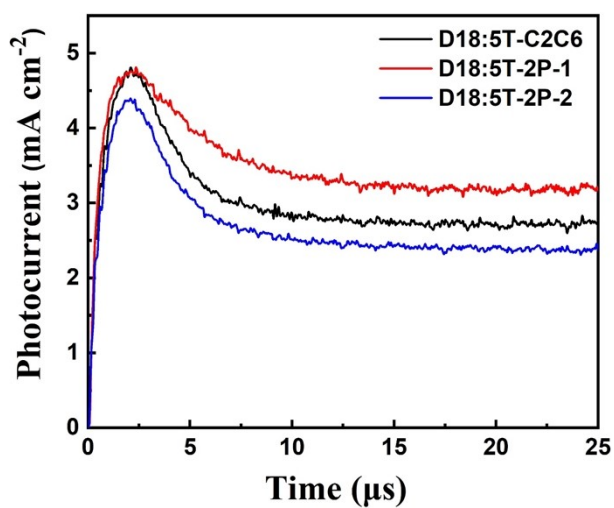

**Fig. S5** Photo-CELIV curves of FNEAs based devices.

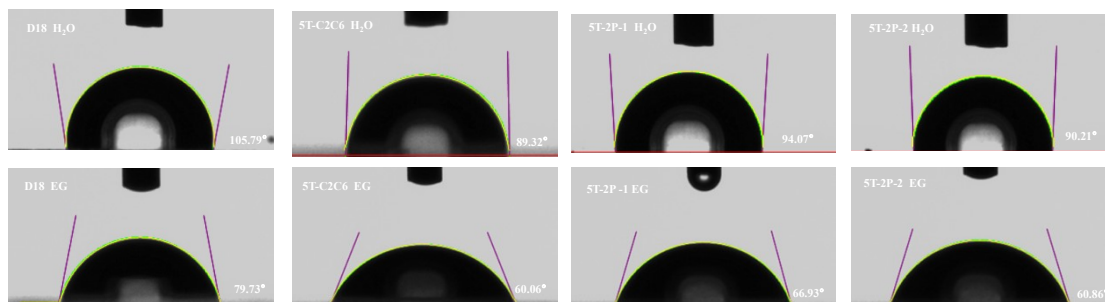

**Fig. S6** Contact angle images for water and ethylene glycol on D18 and FNEAs.

**Table S1.** Photovoltaic parameters of the as-cast OSCs based on nonfused acceptors under standard AM 1.5G illumination, 100 mW cm<sup>-2</sup>.

| Acceptor | $V_{oc}$ (V) | $J_{sc}$ (mA cm <sup>-2</sup> ) | FF (%) | PCE (%)     |
|----------|--------------|---------------------------------|--------|-------------|
| 5T-C2C6  | 0.937        | 49.86                           | 9.69   | 4.53 (4.32) |
| 5T-2P-1  | 0.862        | 52.12                           | 12.51  | 5.62 (5.31) |
| 5T-2P-2  | 0.962        | 46.38                           | 8.12   | 3.62 (3.45) |

**Table S2.** Parameters of the blend films based on different FNEAs from GIWAXS data.

|             | Lamellar stacking      |                  |                         |         | $\pi$ - $\pi$ stacking |                  |                         |          |
|-------------|------------------------|------------------|-------------------------|---------|------------------------|------------------|-------------------------|----------|
|             | $q$ (Å <sup>-1</sup> ) | $d$ -spacing (Å) | FWHM (Å <sup>-1</sup> ) | CCL (Å) | $q$ (Å <sup>-1</sup> ) | $d$ -spacing (Å) | FWHM (Å <sup>-1</sup> ) | CC L (Å) |
| D18:5T-C2C6 | 0.37                   | 16.98            | 0.058                   | 97.5    | 1.77                   | 3.55             | 0.18                    | 32.1     |
| D18:5T-2P-1 | 0.31                   | 20.26            | 0.061                   | 92.7    | 1.68                   | 3.74             | 0.31                    | 17.1     |
| D18:5T-2P-2 | 0.31                   | 20.26            | 0.063                   | 89.7    | 1.68                   | 3.74             | 0.36                    | 15.6     |

<sup>a</sup>Full width at half-maximum (FWHM) of the diffraction peak. <sup>b</sup>Crystal Coherent length (CCL) estimated from the Scherrer equation ( $CCL = 2\pi \times 0.9/\text{FWHM}$ ) for the  $\pi$ - $\pi$  stacking of the face-on crystallite.

**Table S3.** Statistical data of surface tension and interaction parameter.

| Materials | CA Water [deg] | CA EG [deg] | $\gamma^d$ [mN/m] | $\gamma^p$ [mN/m] | $\gamma^{\text{total}}$ [mN/m] | $\gamma_{\text{D18-A}}$ [mN/m] |
|-----------|----------------|-------------|-------------------|-------------------|--------------------------------|--------------------------------|
| D18       | 105.79         | 79.73       | 22.8              | 0.346             | 23.146                         | --                             |
| 5T-C2C6   | 89.32          | 60.06       | 27.522            | 2.985             | 30.507                         | 3.365                          |
| 5T-2P-1   | 94.07          | 66.93       | 25.346            | 2.084             | 27.430                         | 1.378                          |
| 5T-2P-2   | 90.21          | 60.86       | 28.566            | 2.509             | 31.075                         | 2.286                          |

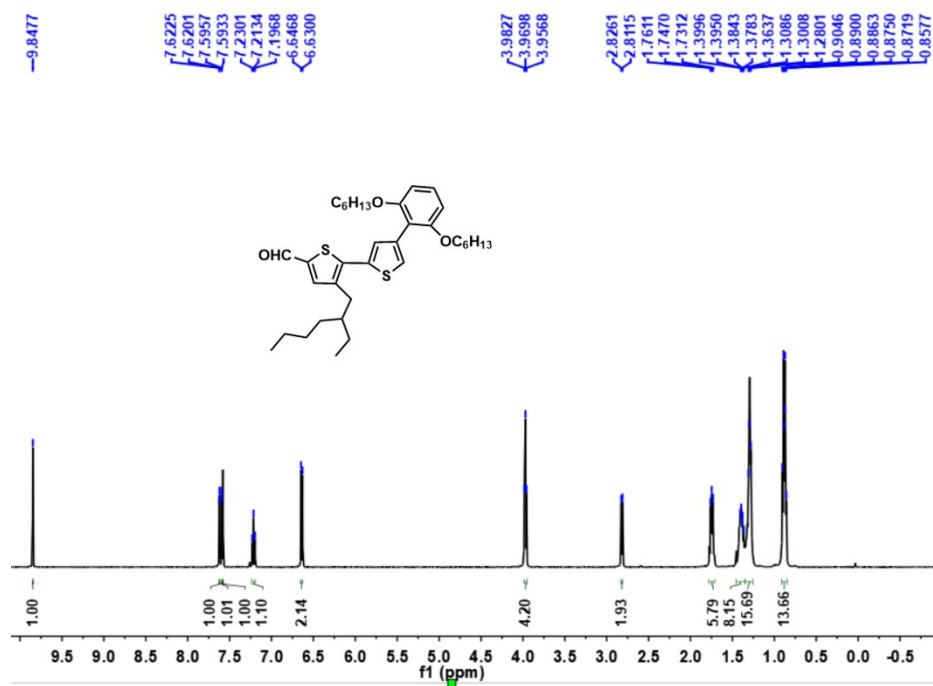

Fig. S7 <sup>1</sup>H NMR spectrum of compound 1-3 in CDCl<sub>3</sub>

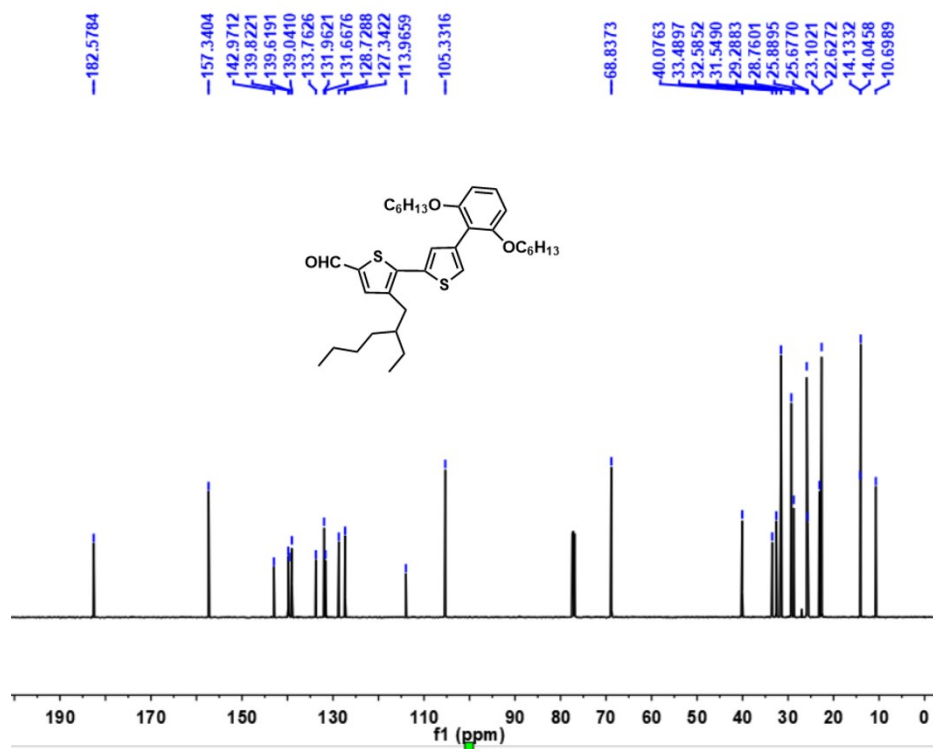

Fig. S8 <sup>13</sup>C NMR spectrum of compound 1-3 in CDCl<sub>3</sub>

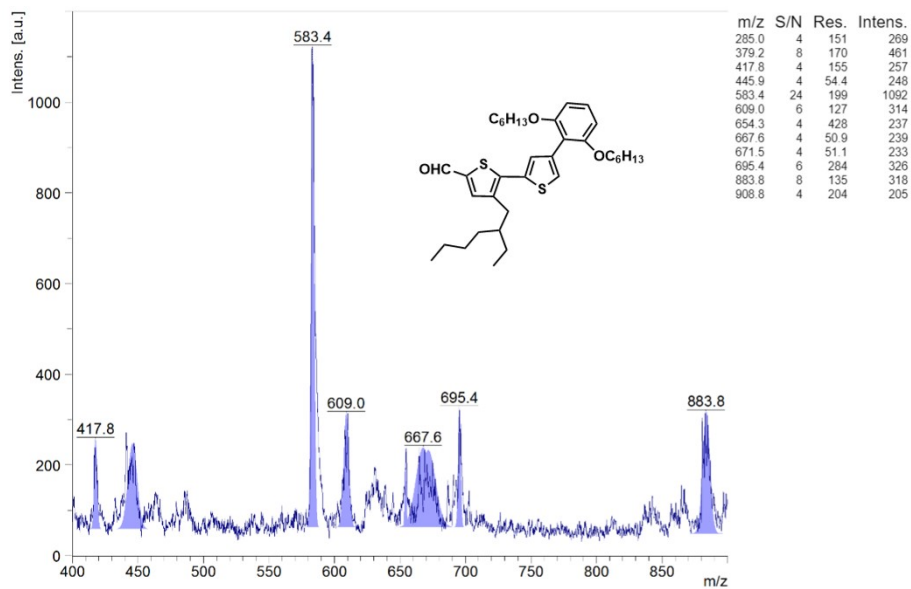

**Fig. S9** MALDI-TOF spectrum of compound 1-3 in  $\text{CDCl}_3$

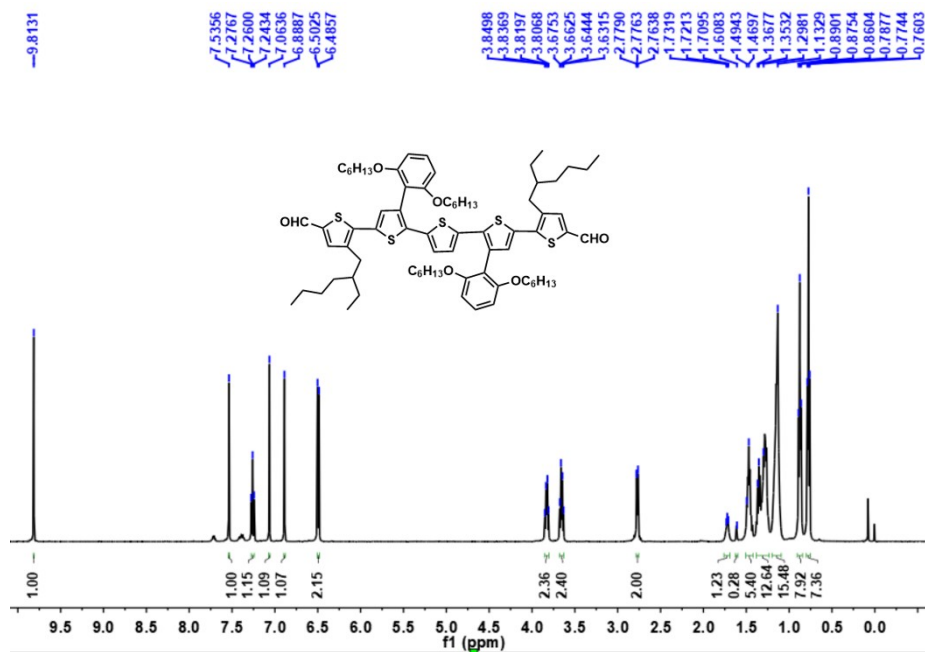

**Fig. S10**  $^1\text{H}$  NMR spectrum of compound 1-5 in  $\text{CDCl}_3$

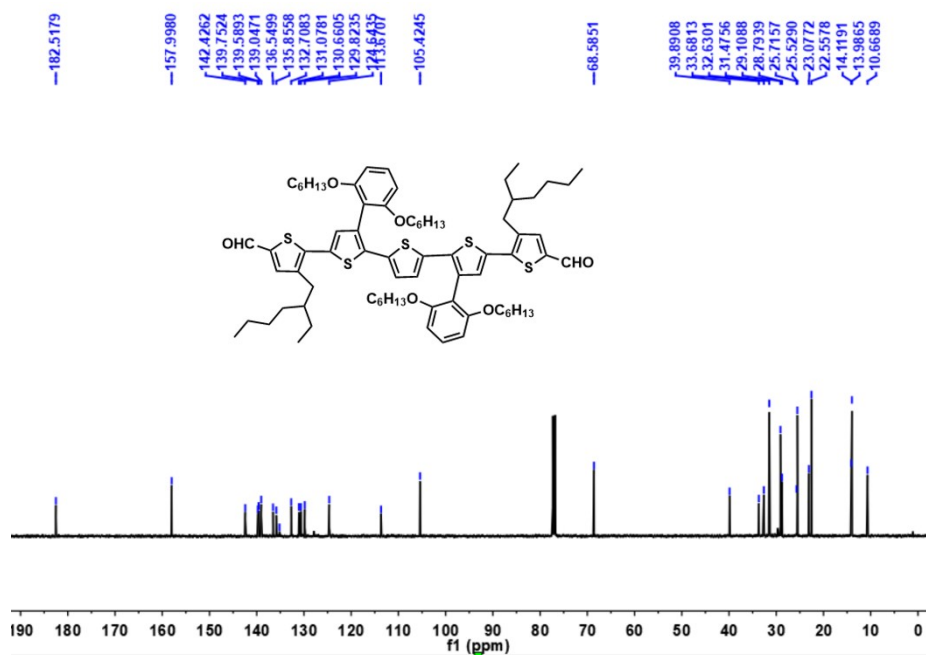

**Fig. S11** <sup>13</sup>C NMR spectrum of compound 1-5 in CDCl<sub>3</sub>

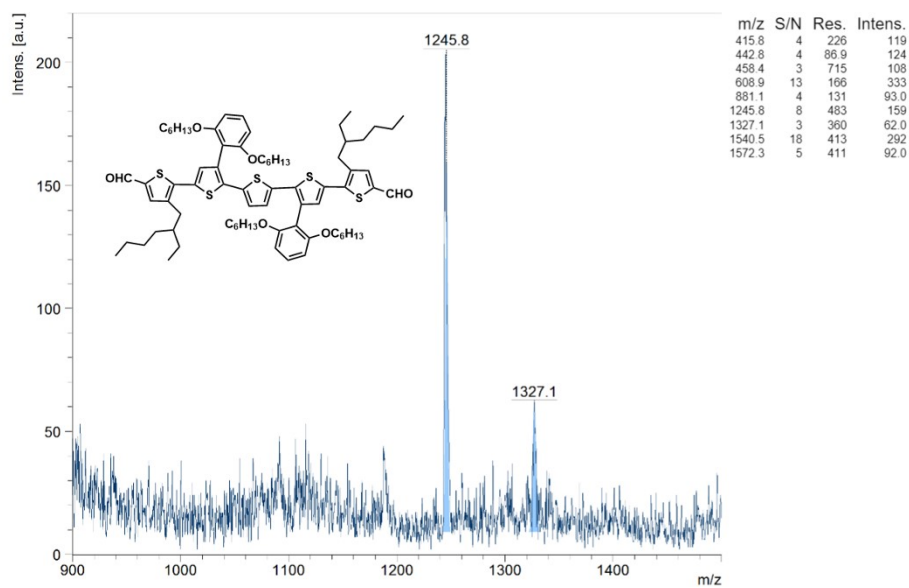

**Fig. S12** MALDI-TOF spectrum of compound 1-5

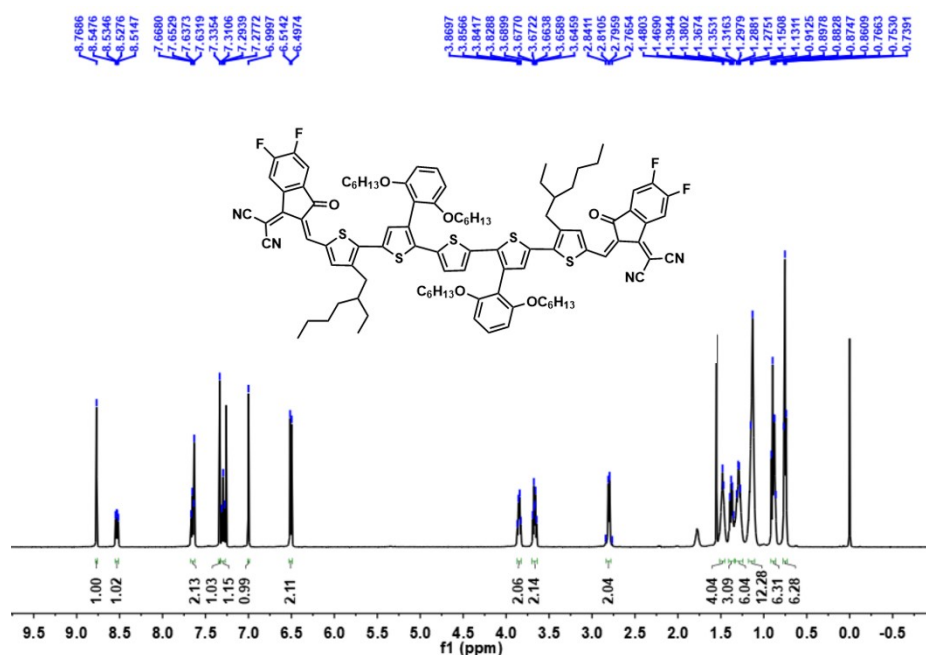

Fig. S13  $^1\text{H}$  NMR spectrum of compound 5T-2P-1 in  $\text{CDCl}_3$

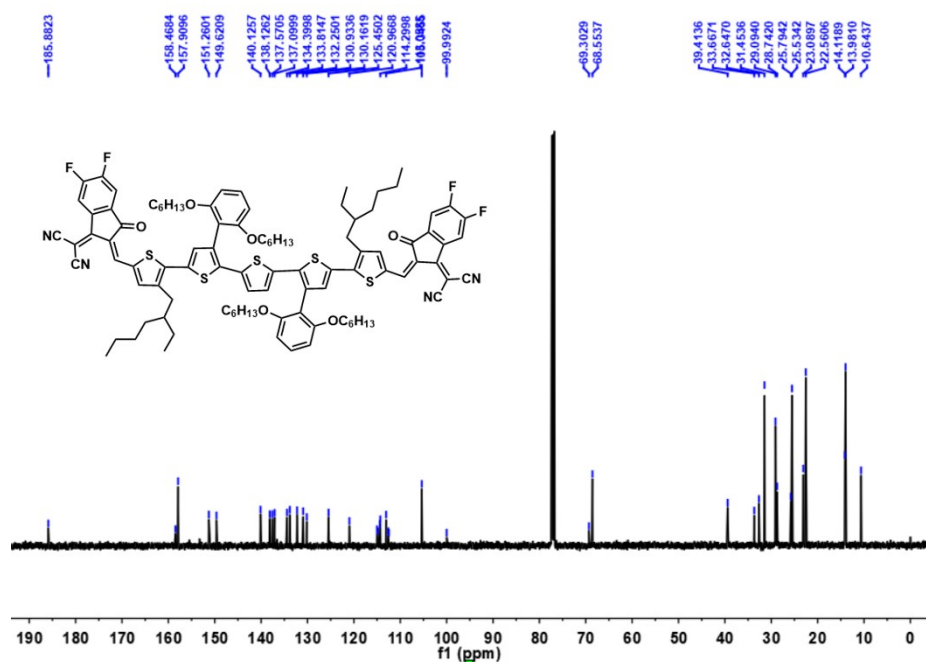

Fig. S14  $^{13}\text{C}$  NMR spectrum of compound 5T-2P-1 in  $\text{CDCl}_3$

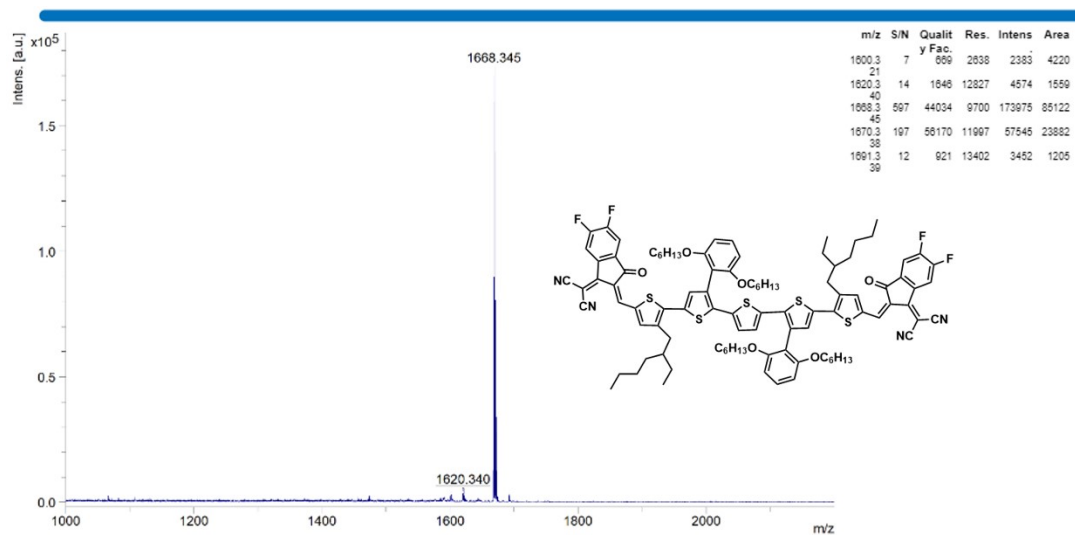

Fig. S15 MALDI-TOF spectrum of compound 5T-2P-1

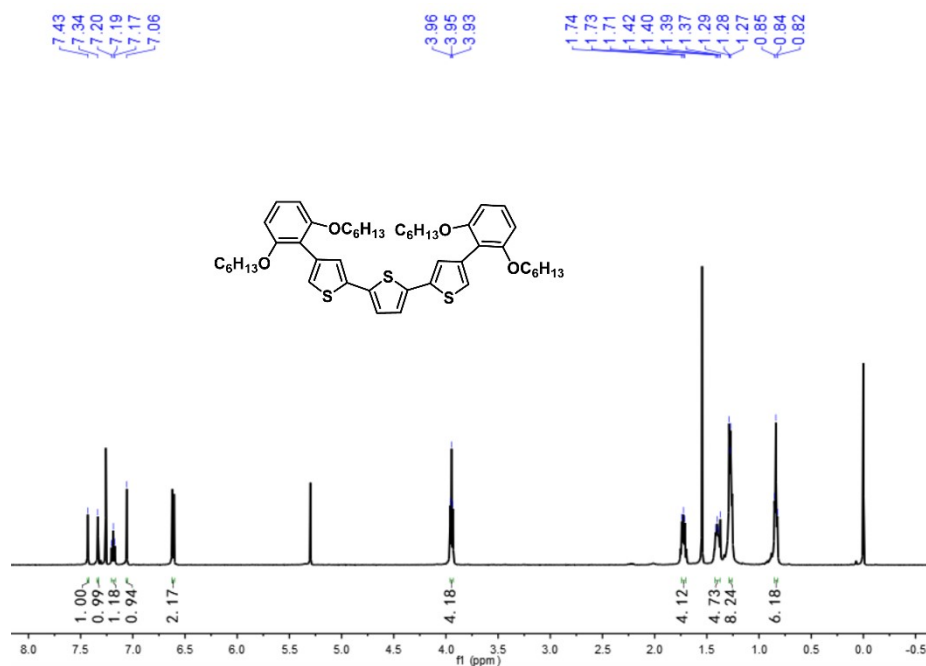

Fig. S16  $^1\text{H}$  NMR spectrum of compound 2-1 in  $\text{CDCl}_3$

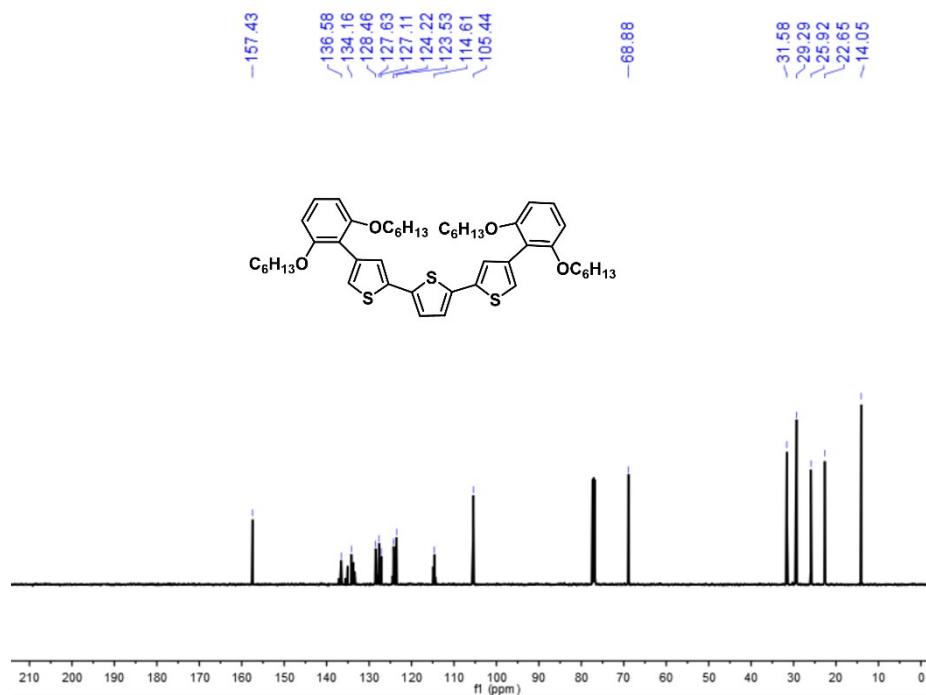

**Fig. S17** <sup>13</sup>C NMR spectrum of compound 2-1 in CDCl<sub>3</sub>

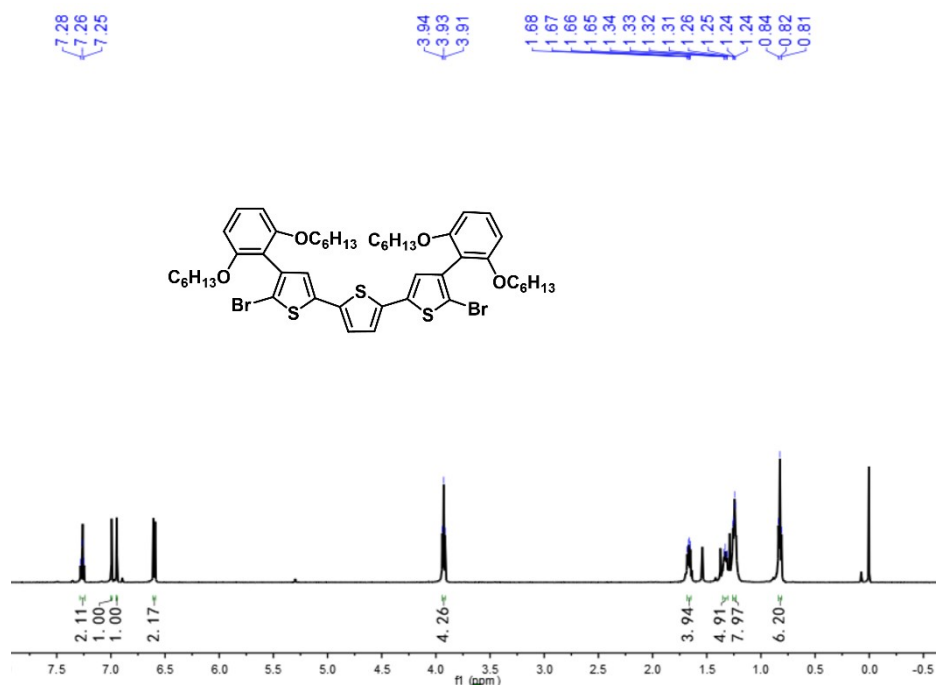

**Fig. S18** <sup>1</sup>H NMR spectrum of compound 2-2 in CDCl<sub>3</sub>

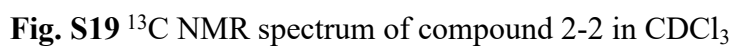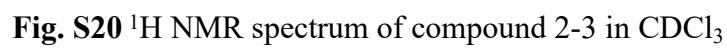



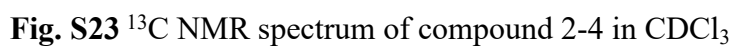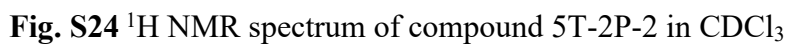

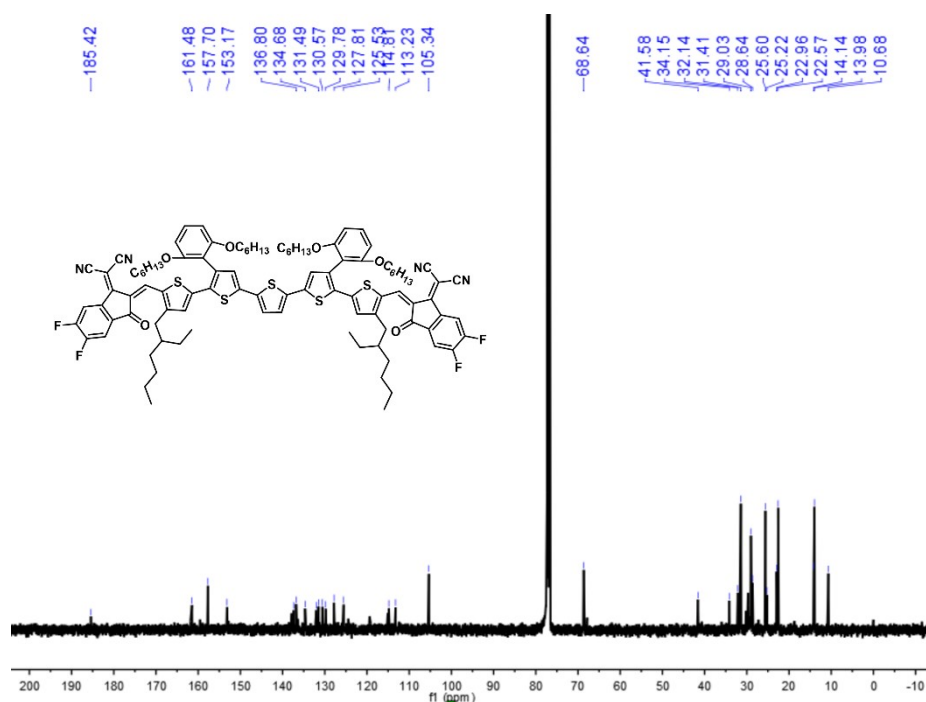

**Fig. S25** <sup>13</sup>C NMR spectrum of compound 5T-2P-2 in CDCl<sub>3</sub>

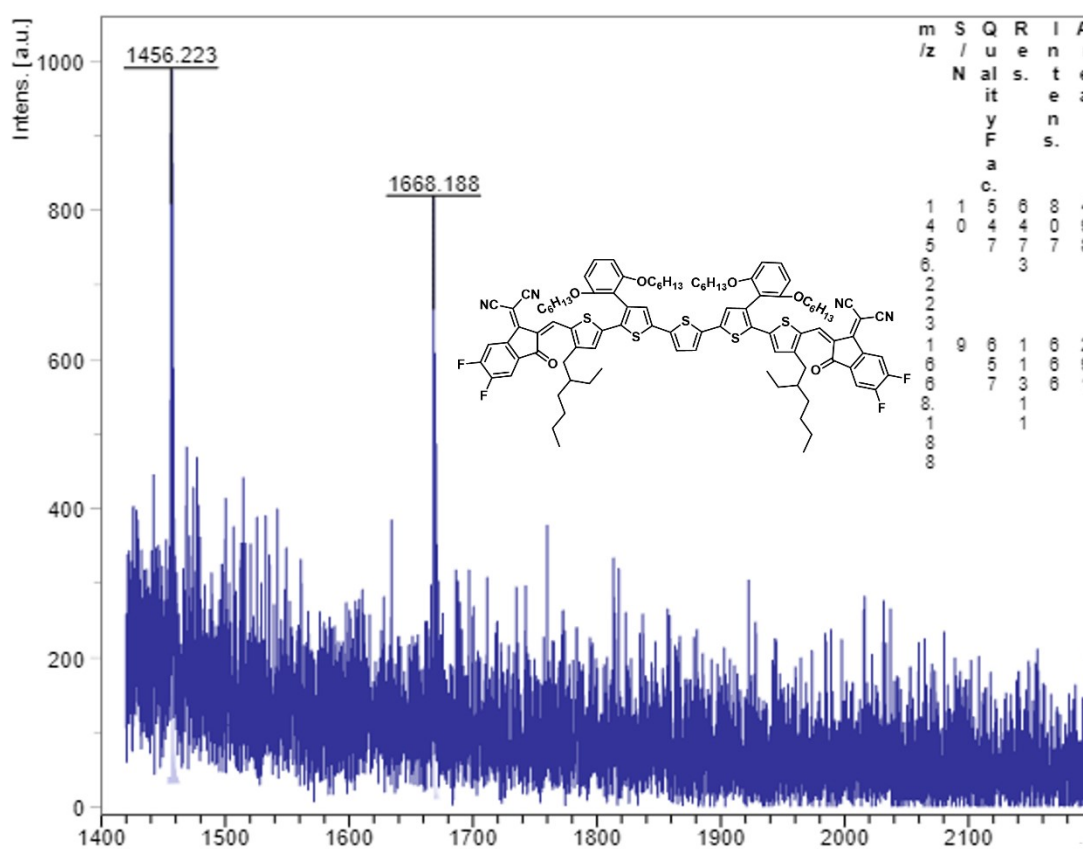

**Fig. S26** MALDI-TOF spectrum of compound 5T-2P-2

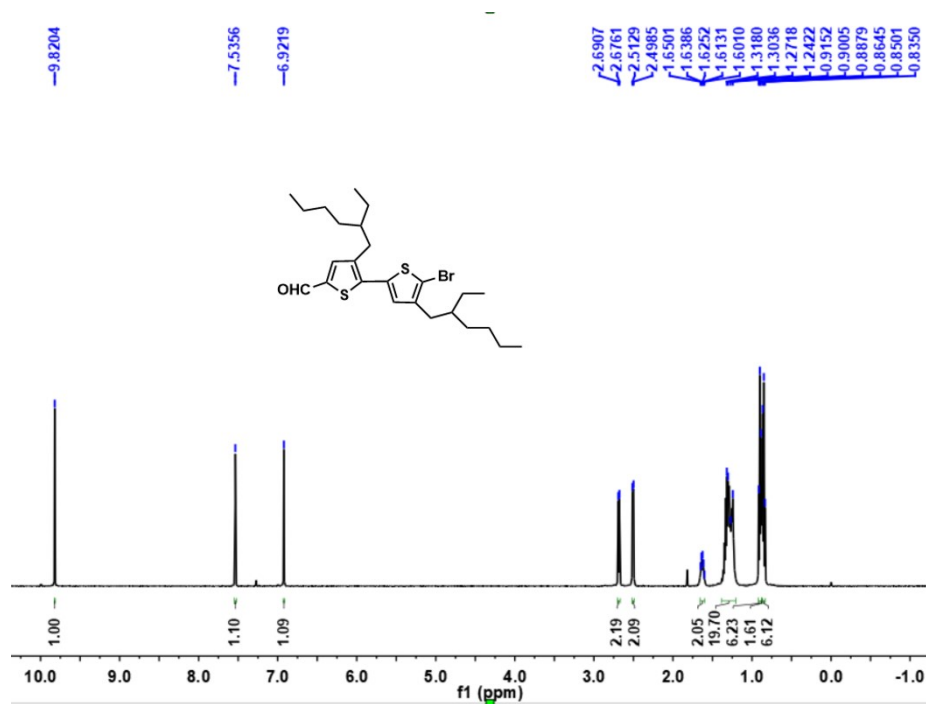

Fig. S27 <sup>1</sup>H NMR spectrum of compound 3-2 in CDCl<sub>3</sub>

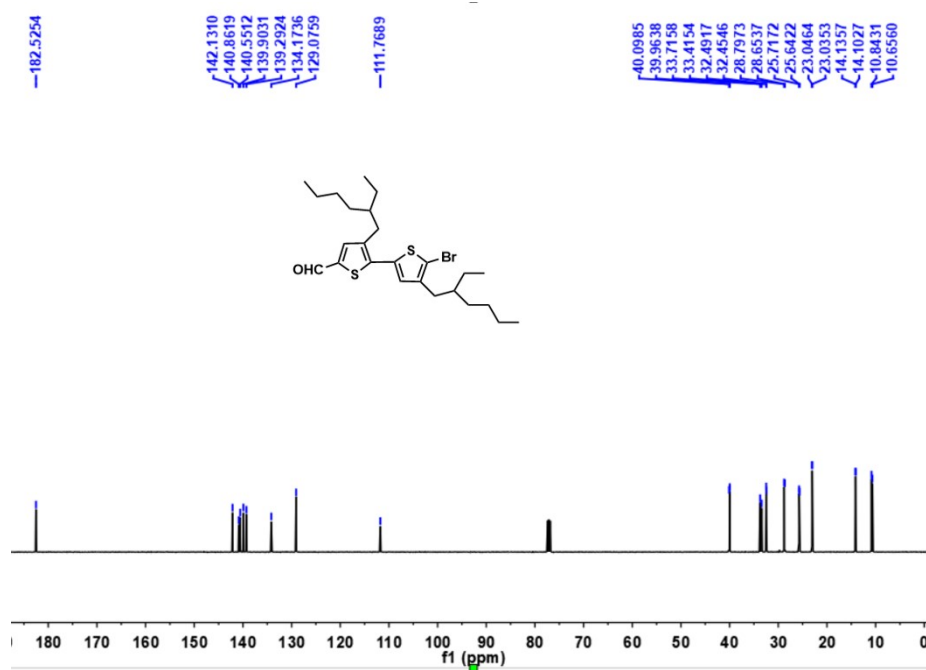

Fig. S28 <sup>13</sup>C NMR spectrum of compound 3-2 in CDCl<sub>3</sub>

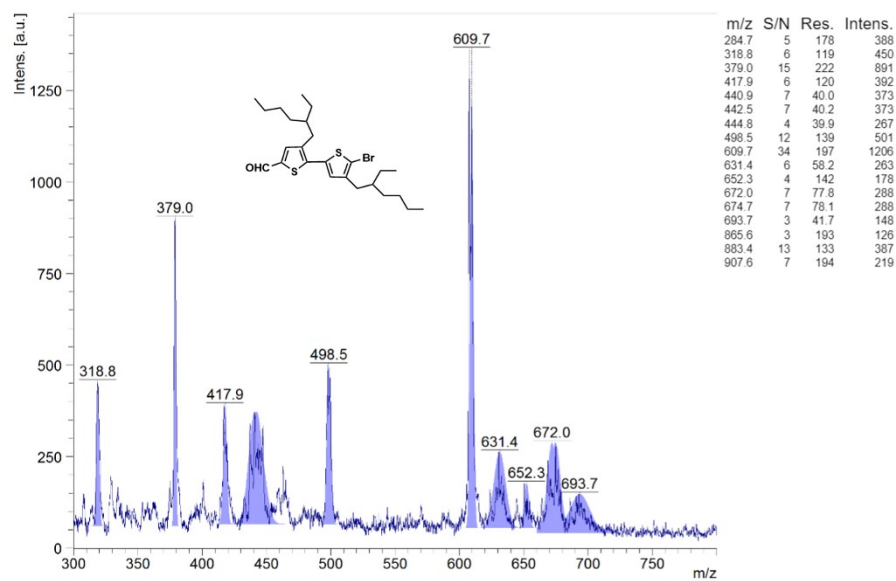

Fig. S29 MALDI-TOF spectrum of compound 3-2

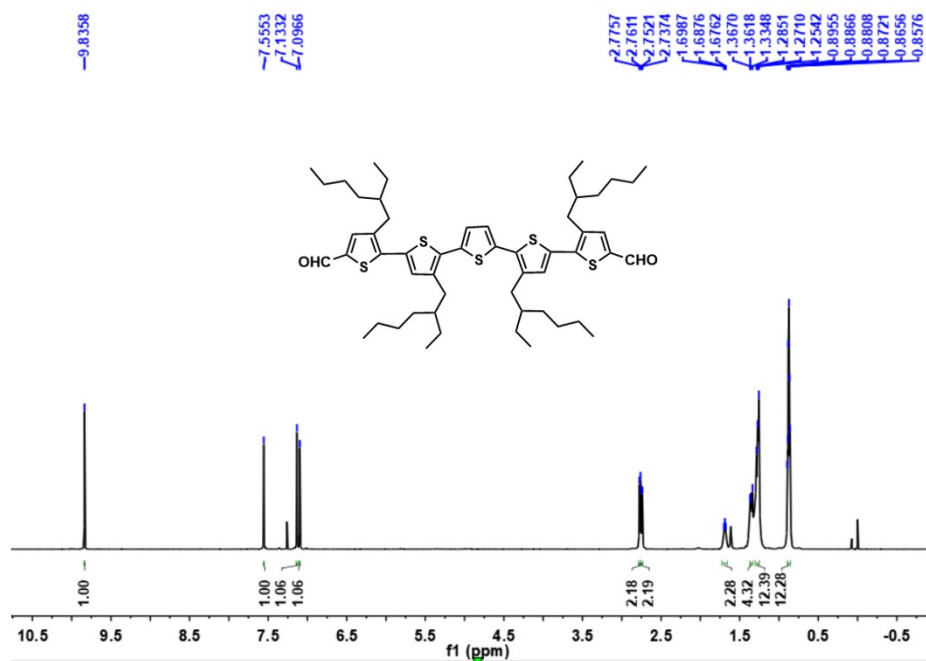

Fig. S30  $^1\text{H}$  NMR spectrum of compound 3-3 in  $\text{CDCl}_3$

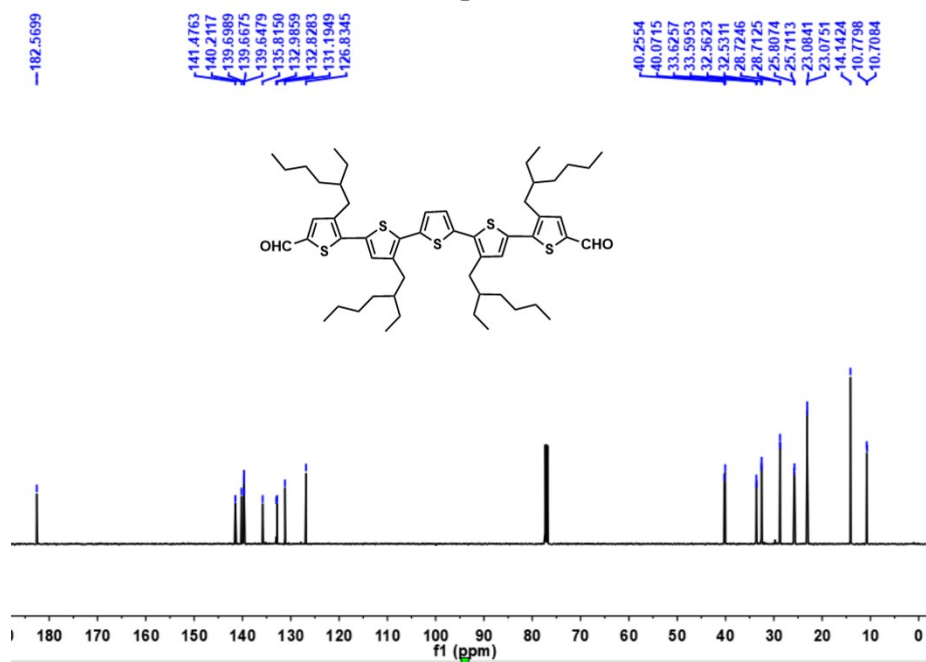

**Fig. S31** <sup>13</sup>C NMR spectrum of compound 3-3 in CDCl<sub>3</sub>

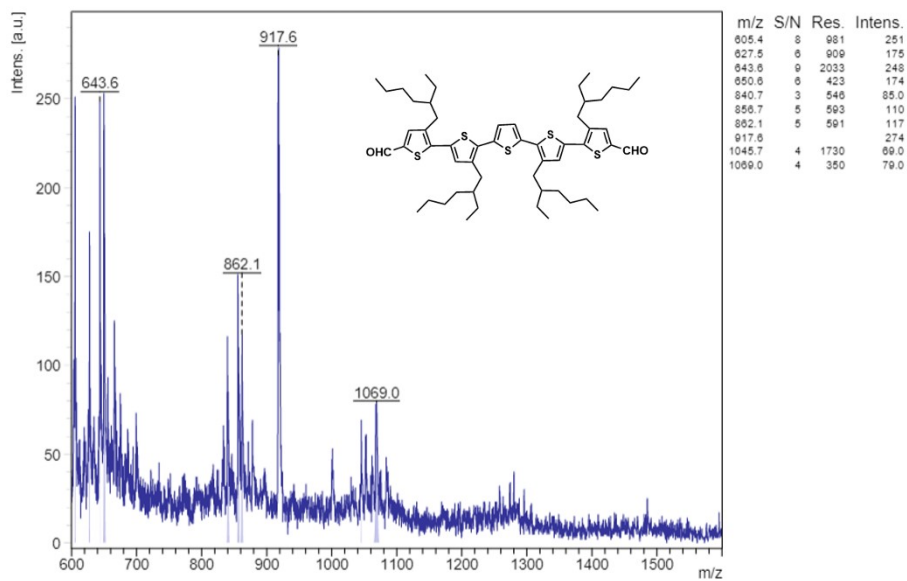

**Fig. S32** MALDI-TOF spectrum of compound 3-3

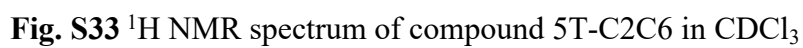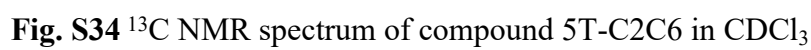

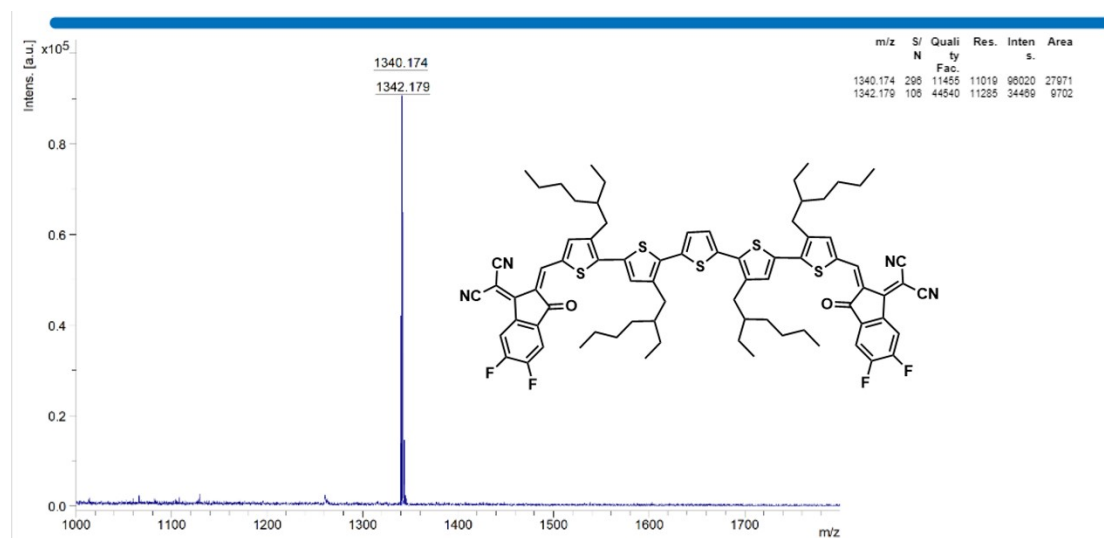

**Fig. S35** MALDI-TOF spectrum of compound 5T-C2C6

## References

- [1] Chen Y N, Li M, Wang Y, et al. A Fully Non-fused Ring Acceptor with Planar Backbone and Near-IR Absorption for High Performance Polymer Solar Cells [J]. *Angew Chem Int Ed*, 2020, 59(50): 22714-22720.
- [2] Lin X, Chen S X, Luping Yu. Dynamics of Photoinduced Electron Transfer in a Molecular Donor-Acceptor Quartet [J]. *The Journal of Physical Chemistry B*, 2006, 110: 11730-11738.
